# Supplementary material for: An Integrative Pharmacology-Based Analysis of Refined Qingkailing Injection Against Cerebral Ischemic Stroke: A Novel Combination of Baicalin, Geniposide, Cholic Acid, and Hyodeoxycholic Acid
Source: Front Pharmacol. 2020 May 8;11:519. doi: 10.3389/fphar.2020.00519 (PMC7227481; doi:10.3389/fphar.2020.00519)
Supplement: Supplementary file 2 [file Table_2.xlsx]

## Sheet: Sheet2
Supplementary Table S2 Therapeutic targets for the treatment of ischemic stroke	Supplementary Table S2 Therapeutic targets for the treatment of ischemic stroke	Supplementary Table S2 Therapeutic targets for the treatment of ischemic stroke	Supplementary Table S2 Therapeutic targets for the treatment of ischemic stroke	Supplementary Table S2 Therapeutic targets for the treatment of ischemic stroke	Supplementary Table S2 Therapeutic targets for the treatment of ischemic stroke	Supplementary Table S2 Therapeutic targets for the treatment of ischemic stroke	Supplementary Table S2 Therapeutic targets for the treatment of ischemic stroke	Supplementary Table S2 Therapeutic targets for the treatment of ischemic stroke	Supplementary Table S2 Therapeutic targets for the treatment of ischemic stroke	Supplementary Table S2 Therapeutic targets for the treatment of ischemic stroke	Supplementary Table S2 Therapeutic targets for the treatment of ischemic stroke	Supplementary Table S2 Therapeutic targets for the treatment of ischemic stroke	Supplementary Table S2 Therapeutic targets for the treatment of ischemic stroke	Supplementary Table S2 Therapeutic targets for the treatment of ischemic stroke	Supplementary Table S2 Therapeutic targets for the treatment of ischemic stroke	Supplementary Table S2 Therapeutic targets for the treatment of ischemic stroke	Supplementary Table S2 Therapeutic targets for the treatment of ischemic stroke	Supplementary Table S2 Therapeutic targets for the treatment of ischemic stroke	Supplementary Table S2 Therapeutic targets for the treatment of ischemic stroke	Supplementary Table S2 Therapeutic targets for the treatment of ischemic stroke	Supplementary Table S2 Therapeutic targets for the treatment of ischemic stroke	Supplementary Table S2 Therapeutic targets for the treatment of ischemic stroke	Supplementary Table S2 Therapeutic targets for the treatment of ischemic stroke	Supplementary Table S2 Therapeutic targets for the treatment of ischemic stroke	Supplementary Table S2 Therapeutic targets for the treatment of ischemic stroke	Supplementary Table S2 Therapeutic targets for the treatment of ischemic stroke	Supplementary Table S2 Therapeutic targets for the treatment of ischemic stroke	Supplementary Table S2 Therapeutic targets for the treatment of ischemic stroke	Supplementary Table S2 Therapeutic targets for the treatment of ischemic stroke	Supplementary Table S2 Therapeutic targets for the treatment of ischemic stroke	Supplementary Table S2 Therapeutic targets for the treatment of ischemic stroke	Supplementary Table S2 Therapeutic targets for the treatment of ischemic stroke	Supplementary Table S2 Therapeutic targets for the treatment of ischemic stroke	Supplementary Table S2 Therapeutic targets for the treatment of ischemic stroke	Supplementary Table S2 Therapeutic targets for the treatment of ischemic stroke	Supplementary Table S2 Therapeutic targets for the treatment of ischemic stroke	Supplementary Table S2 Therapeutic targets for the treatment of ischemic stroke	Supplementary Table S2 Therapeutic targets for the treatment of ischemic stroke	Supplementary Table S2 Therapeutic targets for the treatment of ischemic stroke	Supplementary Table S2 Therapeutic targets for the treatment of ischemic stroke	Supplementary Table S2 Therapeutic targets for the treatment of ischemic stroke	Supplementary Table S2 Therapeutic targets for the treatment of ischemic stroke	Supplementary Table S2 Therapeutic targets for the treatment of ischemic stroke	Supplementary Table S2 Therapeutic targets for the treatment of ischemic stroke	Supplementary Table S2 Therapeutic targets for the treatment of ischemic stroke	Supplementary Table S2 Therapeutic targets for the treatment of ischemic stroke	Supplementary Table S2 Therapeutic targets for the treatment of ischemic stroke	Supplementary Table S2 Therapeutic targets for the treatment of ischemic stroke	Supplementary Table S2 Therapeutic targets for the treatment of ischemic stroke
GENE_SYMBOL	GENE_NAME	Source
PTGS2	Prostaglandin G/H synthase 2	TTD
GABBR2	Gamma-aminobutyric acid receptor	TTD
HTR3A	5-hydroxytryptamine receptor	TTD
GRIA2	Glutamate receptor AMPA subtype	TTD
NMDAR	NMDA receptor	TTD
KCNMB1	Calcium-activated potassium channel	TTD
PDE1A	Calcium/calmodulin-dependent 3',5'-cyclic nucleotide phosphodiesterase 1	TTD
PARP1	Poly [ADP-ribose] polymerase-1	TTD
F2	Thrombin	TTD
GLRA1	Glycine receptor	TTD
F2R	Proteinase activated receptor 1	TTD
MMP2	72 kDa type IV collagenase	TTD
ITGB2	Integrin beta-2	TTD
FLNA	Filamin A	TTD
IRF1	Interferon regulatory factor 1	TTD
PRKCG	Protein kinase C gamma type	TTD
DAPK1	Death-associated protein kinase 1	TTD
CA10	Carbonic anhydrase-related protein 10	TTD
CALCA	Calcitonin gene-related peptide 1	TTD
LAMB1	Laminin subunit beta-1	TTD
PKC	Protein kinase C	TTD
CALCB	Calcitonin gene-related peptide 2	TTD
STK36	Serine/threonine-protein kinase 36	TTD
SLC29A4	Equilibrative nucleoside transporter 4	TTD
HTR1B	5-hydroxytryptamine receptor 1B	TTD
CIB1	Calcium and integrin-binding protein 1	TTD
EPHB2	Ephrin type-B receptor 2	TTD
APP	Amyloid beta A4 protein	TTD
JUN	activator protein 1	TTD
HTR1B	5-hydroxytryptamine receptor 1	TTD
ASIC3	Acid-sensing ion channel 3	TTD
GRIN2B	Glutamate receptor ionotropic, NMDA 2B	TTD
ASIC1	Acid-sensing ion channel 1	TTD
HIF1A	Hypoxia-inducible factor 1-alpha	TTD
GRIN1	Glutamate (NMDA) receptor	TTD
KCNB1	Potassium voltage-gated channel subfamily B member 1	TTD
PDE4D	cAMP-specific 3',5'-cyclic phosphodiesterase 4D	OMIM
GP1BA	Platelet glycoprotein Ib alpha chain	OMIM
EPHX2	Bifunctional epoxide hydrolase 2	OMIM
MTHFR	Methylenetetrahydrofolate reductase	OMIM
APOE	Apolipoprotein E	OMIM
PROZ	Vitamin K-dependent protein Z	OMIM
VCAM1	Vascular cell adhesion protein 1	OMIM
PDGFRA	Platelet-derived growth factor receptor alpha	OMIM
NPPB	Natriuretic peptides B	OMIM
PDGFC	Platelet-derived growth factor C	OMIM
NOTCH3	Neurogenic locus notch homolog protein 3	OMIM
SELP	P-selectin	OMIM
F2	Prothrombin	OMIM
ABCC8	ATP-binding cassette sub-family C member 8 ABC transporter C family member 8	OMIM
RNF213	E3 ubiquitin-protein ligase RNF213	OMIM
TET2	Tetraspanin-2 Methylcytosine dioxygenase TET2	OMIM
F5	Coagulation factor V	OMIM
TNFRSF1A	Tumor necrosis factor receptor superfamily member 1A	OMIM
ACTA2	Actin, aortic smooth muscle	OMIM
COL4A1	Collagen alpha-1(IV) chain	OMIM
THBD	Thrombomodulin	OMIM
KCNK2	Potassium channel subfamily K member 2	OMIM
CECR1	Adenosine deaminase 2	OMIM
LDLR	Low-density lipoprotein receptor	OMIM
IL4	Interleukin-4	OMIM
SREBF1	Sterol regulatory element-binding protein 1	OMIM
INSIG1	Insulin-induced gene protein Insulin-induced gene 1 protein	OMIM
BAK1	BRASSINOSTEROID INSENSITIVE 1-associated receptor kinase 1 Bcl-2 homologous antagonist/killer	OMIM
PLG	Plasminogen	OMIM
BARD1	BRCA1-associated RING domain protein 1	OMIM
GUCY1A3	Guanylate cyclase soluble subunit alpha-1	OMIM
PCSK9	Proprotein convertase subtilisin/kexin type 9	OMIM
DDIT4	DNA damage-inducible transcript 4 protein	OMIM
ALOX5AP	Arachidonate 5-lipoxygenase-activating protein	OMIM
SIRT2	NAD-dependent protein deacetylase NAD-dependent protein deacetylase sirtuin-2	OMIM
AQP4	Aquaporin-4	OMIM
CBS	Cystathionine beta-synthase Cystathionine beta-synthase-like protein	OMIM
CFH	Complement factor H	OMIM
MYBPC3	Myosin-binding protein C, cardiac-type	OMIM
COL3A1	Collagen alpha-1(III) chain	OMIM
ARL6IP6	ADP-ribosylation factor-like protein 6-interacting protein 6	OMIM
PROS1	Vitamin K-dependent protein S	OMIM
ATP7B	Copper-transporting ATPase 2	OMIM
SELENOS	Selenoprotein S	OMIM
NOS1	Nitric oxide synthase, brain Nitric oxide synthase	OMIM
MMP9	Matrix metalloproteinase-9	OMIM
GRIN2B	Glutamate receptor ionotropic, NMDA 2B	OMIM
APOLD1	Apolipoprotein L domain-containing protein 1	OMIM
SCG2	Secretogranin-2	OMIM
PARK2	E3 ubiquitin-protein ligase parkin	OMIM
DLG4	Disks large homolog 4	OMIM
HTRA1	Serine protease HTRA1	OMIM
HYOU1	Hypoxia up-regulated protein 1	OMIM
EPO	Erythropoietin	OMIM
UCP2	Mitochondrial uncoupling protein 2	OMIM
ACCN2	Acid-sensing ion channel 1	OMIM
TNF	Tumor necrosis factor	OMIM
TNFRSF1B	Tumor necrosis factor receptor superfamily member 1B	OMIM
SLC1A2	Amino acid transporter Excitatory amino acid transporter 2	OMIM
LGMN	Legumain	OMIM
SET	Protein SET	OMIM
AGAP2	Arf-GAP with GTPase, ANK repeat and PH domain-containing protein 2	OMIM
GRIN1	Glutamate receptor ionotropic, NMDA 1	OMIM
VEGFA	Vascular endothelial growth factor A	OMIM
HSF1	Heat stress transcription factor A-1a Heat shock factor protein 1 Heat shock factor protein	OMIM
FGB	Fibrinogen beta chain	OMIM
DAPK1	Death-associated protein kinase 1	OMIM
APP	Amyloid-beta A4 protein	OMIM
YRDC	YrdC domain-containing protein, mitochondrial	OMIM
GH1	Somatotropin Auxin-induced protein	OMIM
GRIN2A	Glutamate receptor ionotropic, NMDA 2A	OMIM
AKT1S1	Proline-rich AKT1 substrate 1	OMIM
PRKAA1	Non-specific serine/threonine protein kinase 5'-AMP-activated protein kinase catalytic subunit alpha-1	OMIM
MIF	Macrophage migration inhibitory factor	OMIM
PRKCE	Protein kinase C epsilon type Protein kinase C	OMIM
GRIN3A	Glutamate receptor ionotropic, NMDA 3A	OMIM
KCNE2	Potassium voltage-gated channel subfamily E member 2	OMIM
ADORA2A	Adenosine receptor A2 Adenosine receptor A2a	OMIM
NF1	Neurofibromin	OMIM
TRPA1	Transient receptor potential cation channel subfamily A member 1	OMIM
HIF1A	Hypoxia-inducible factor 1-alpha	OMIM
CRP	Pentaxin C-reactive protein	OMIM
BCL2L11	Bcl-2-like protein 11	OMIM
TRIM2	Tripartite motif-containing protein 2	OMIM
CD4	T-cell surface glycoprotein CD4	OMIM
AGTR1	Type-1 angiotensin II receptor	OMIM
MAPKAPK2	MAP kinase-activated protein kinase 2	OMIM
CXCL12	Stromal cell-derived factor 1	OMIM
KDR	Vascular endothelial growth factor receptor 2 Transcription factor PRE6	OMIM
AKT1	Non-specific serine/threonine protein kinase RAC-alpha serine/threonine-protein kinase	OMIM
MAPK10	Mitogen-activated protein kinase Mitogen-activated protein kinase 10	OMIM
STC1	Stanniocalcin-1	OMIM
CDK5	Cyclin-dependent-like kinase 5	OMIM
PPARGC1A	Peroxisome proliferator-activated receptor gamma coactivator 1-alpha	OMIM
PGF	Placenta growth factor	OMIM
EGLN1	Egl nine homolog 1	OMIM
CTSL	Cathepsin L1	OMIM
NDNF	Protein NDNF	OMIM
SHMT2	Serine hydroxymethyltransferase Serine hydroxymethyltransferase, mitochondrial	OMIM
GLDC	Glycine cleavage system P protein Glycine dehydrogenase (decarboxylating), mitochondrial	OMIM
S100B	Protein S100 Protein S100-B	OMIM
THBS1	Thrombospondin-1	OMIM
AQP1	Aquaporin-1	OMIM
P2RX5	p2X purinoceptor P2X purinoceptor P2X purinoceptor 5	OMIM
ACCN3	Acid-sensing ion channel 3	OMIM
C3	Replication enhancer Complement C3 Complement C3 alpha chain Replication enhancer protein	OMIM
C3AR1	C3a anaphylatoxin chemotactic receptor	OMIM
NGB	Neuroglobin	OMIM
KCNMB1	Calcium-activated potassium channel subunit beta-1	OMIM
GPR17	Uracil nucleotide/cysteinyl leukotriene receptor	OMIM
TLR4	Toll-like receptor 4	OMIM
ESR1	Estrogen receptor Ethylene-responsive transcription factor ESR1	OMIM
SERPINE1	Plasminogen activator inhibitor 1	OMIM
CLU	Clusterin	OMIM
TCF17	TRANSCRIPTION FACTOR 17	OMIM
HAVCR1	Hepatitis A virus cellular receptor 1	OMIM
IL20	Interleukin-20	OMIM
APIP	Methylthioribulose-1-phosphate dehydratase	OMIM
HMOX1	Heme oxygenase Heme oxygenase 1	OMIM
FNDC1	Fibronectin type III domain-containing protein 1	OMIM
JAK2	Tyrosine-protein kinase Tyrosine-protein kinase JAK2	OMIM
NFKB1	Nuclear factor NF-kappa-B p105 subunit	OMIM
PLP2	Phosducin-like protein 2 Proteolipid protein 2	OMIM
MMP2	72 kDa type IV collagenase	OMIM
G6PD	Glucose-6-phosphate 1-dehydrogenase	OMIM
HNRNPA2B1	Heterogeneous nuclear ribonucleoproteins A2/B1	OMIM
RGCC	Regulator of cell cycle RGCC	OMIM
HNRNPL	Heterogeneous nuclear ribonucleoprotein L	OMIM
SLC2A1	Solute carrier family 2, facilitated glucose transporter member 1	OMIM
NPY	Pro-neuropeptide Y	OMIM
SLC1A3	Amino acid transporter Excitatory amino acid transporter 1	OMIM
BDKRB1	B1 bradykinin receptor	OMIM
ADORA3	Adenosine receptor A3 Transmembrane domain-containing protein TMIGD3	OMIM
BDKRB2	B2 bradykinin receptor	OMIM
CAMK2A	Calcium/calmodulin-dependent protein kinase type II subunit alpha	OMIM
CLIC4	Chloride intracellular channel protein 4 Chloride intracellular channel protein	OMIM
CRYAA	Alpha-crystallin A chain	OMIM
VEGFB	Vascular endothelial growth factor B	OMIM
CCL21	C-C motif chemokine 21	OMIM
ADIPOQ	Adiponectin	OMIM
BCL2	Apoptosis regulator Bcl-2	OMIM
PDGFB	Platelet-derived growth factor subunit B	OMIM
FGF2	Fibroblast growth factor Fibroblast growth factor 2	OMIM
LCN2	Neutrophil gelatinase-associated lipocalin	OMIM
NDRG4	Protein NDRG4	OMIM
PARP1	Poly [ADP-ribose] polymerase Poly [ADP-ribose] polymerase 1	OMIM
SOD1	Superoxide dismutase [Cu-Zn] Superoxide dismutase	OMIM
BNIP3	BCL2/adenovirus E1B 19 kDa protein-interacting protein 3	OMIM
BACE1	Beta-secretase 1	OMIM
GGA3	ADP-ribosylation factor-binding protein GGA3	OMIM
PPIF	Peptidyl-prolyl cis-trans isomerase Peptidyl-prolyl cis-trans isomerase F, mitochondrial	OMIM
SLC8A3	Sodium/calcium exchanger 3	OMIM
EDIL3	EGF-like repeat and discoidin I-like domain-containing protein 3	OMIM
SAV1	Protein salvador homolog 1	OMIM
SUCNR1	Succinate receptor 1	OMIM
ZC3H12A	Endoribonuclease ZC3H12A Ribonuclease ZC3H12A	OMIM
PYGM	Alpha-1,4 glucan phosphorylase Glycogen phosphorylase, muscle form	OMIM
C1QR1	Complement component C1q receptor	OMIM
FN1	Fibronectin	OMIM
TMBIM6	Bax inhibitor 1	OMIM
CTNNA3	Catenin alpha-3	OMIM
EIF2S1	Eukaryotic translation initiation factor 2 subunit 1	OMIM
HTRA2	Serine protease HTRA2, mitochondrial	OMIM
CD300LB	CMRF35-like molecule 7	OMIM
SHC3	SHC-transforming protein 3	OMIM
CASP2	CASP-like protein Casparian strip membrane protein 2 Caspase-2	OMIM
SOD2	Superoxide dismutase [Mn], mitochondrial Superoxide dismutase	OMIM
OGFOD1	Prolyl 3-hydroxylase OGFOD1	OMIM
IGHD2	Somatotropin	OMIM
PIK3R1	Phosphatidylinositol 3-kinase regulatory subunit alpha	OMIM
SERPINF1	Pigment epithelium-derived factor	OMIM
PLAT	Plasminogen activator Tissue-type plasminogen activator	OMIM
P4HB	Protein disulfide-isomerase	OMIM
HNF1B	Hepatocyte nuclear factor 1-beta	OMIM
DES	Desmin 9-divinyl ether synthase	OMIM
HSD11B1	Corticosteroid 11-beta-dehydrogenase isozyme 1	OMIM
GRK5	G protein-coupled receptor kinase G protein-coupled receptor kinase 5	OMIM
GRM3	Metabotropic glutamate receptor 3	OMIM
NTN1	Netrin-1	OMIM
AR	Androgen receptor	OMIM
LAMA4	Laminin subunit alpha-4	OMIM
CAMP	Cathelicidin antimicrobial peptide Cathelicidin-7 Antimicrobial protein CAP18 Cathelicidin-2	OMIM
LRP1	Low-density lipoprotein receptor-related protein 1 Protein LATERAL ROOT PRIMORDIUM 1 Prolow-density lipoprotein receptor-related protein 1 Exosome complex protein LRP1	OMIM
TLR2	Toll-like receptor Toll-like receptor 2	OMIM
PARG	Poly(ADP-ribose) glycohydrolase	OMIM
KMO	Kynurenine 3-monooxygenase	OMIM
ADAMTS13	A disintegrin and metalloproteinase with thrombospondin motifs 13	OMIM
STIM1	Stromal interaction molecule 1	OMIM
OLIG2	Oligodendrocyte transcription factor 2	OMIM
EGLN2	Egl nine homolog 2	OMIM
TXNRD2	Thioredoxin reductase 2, mitochondrial	OMIM
SLC8B1	Mitochondrial sodium/calcium exchanger protein	OMIM
ZNF667	Zinc finger protein 667	OMIM
LMF1	Lipase maturation factor Lipase maturation factor 1	OMIM
SIRT1	NAD-dependent protein deacetylase sirtuin-1	OMIM
PMAIP1	Phorbol-12-myristate-13-acetate-induced protein 1	OMIM
CDK5RAP3	CDK5 regulatory subunit-associated protein 3	OMIM
H2AFX	Histone H2A Histone H2AX	OMIM
MBL2	Mannose-binding protein C Mannose-binding protein	OMIM
MC1R	Melanocyte-stimulating hormone receptor	OMIM
LIF	Leukemia inhibitory factor	OMIM
CXCR4	C-X-C chemokine receptor type 4	OMIM
FLT1	Vascular endothelial growth factor receptor 1	OMIM
SPP1	Osteopontin Probable sucrose-phosphatase 1 COMPASS component SPP1 Lipid phosphate phosphatase delta	OMIM
REN	Replication enhancer Renin	OMIM
SOD3	Extracellular superoxide dismutase [Cu-Zn]	OMIM
TTN	Titin	OMIM
COL15A1	Collagen alpha-1(XV) chain	OMIM
CASP3	Caspase-3 Casparian strip membrane protein 3 CASP-like protein	OMIM
THBS4	Thrombospondin-4	OMIM
IL18	Interleukin-18	OMIM
MTOR	Serine/threonine-protein kinase mTOR Serine/threonine-protein kinase TOR	OMIM
GRINA	Protein lifeguard 1	OMIM
GRIN2C	Glutamate receptor ionotropic, NMDA 2C	OMIM
NRG1	Transcriptional regulator NRG1 Pro-neuregulin-1, membrane-bound isoform	OMIM
PML	Protein PML Retinoic acid receptor alpha	OMIM
PSEN1	Presenilin Presenilin-1	OMIM
SERPINA3	Alpha-1-antichymotrypsin Serpin A3-5	OMIM
ATP7A	Copper-transporting ATPase 1	OMIM
TMSB4X	Thymosin beta-4	OMIM
CD40LG	CD40 ligand	OMIM
WT1	Wilms tumor protein homolog Wilms tumor protein	OMIM
NPC1	NPC intracellular cholesterol transporter 1 Non-specific phospholipase C1	OMIM
GRIN2D	Glutamate receptor ionotropic, NMDA 2D	OMIM
TMEM123	Porimin	OMIM
ANKRD1	Ankyrin repeat domain-containing protein 1	OMIM
PLA2G3	Group 3 secretory phospholipase A2	OMIM
ADPGK	ADP-dependent glucokinase	OMIM
KL	Klotho	OMIM
S1PR2	Sphingosine 1-phosphate receptor 2	OMIM
DLL4	Delta-like protein Delta-like protein 4	OMIM
PAPPA	Pappalysin-1	OMIM
HBB	Hemoglobin subunit beta	OMIM
CA4	Carbonic anhydrase 4	OMIM
CTNNA1	Catenin alpha-1	OMIM
OLR1	Oxidized low-density lipoprotein receptor 1	OMIM
PC	Pyruvate carboxylase Pyruvate carboxylase, mitochondrial	OMIM
CD36	Platelet glycoprotein 4	OMIM
PHKA1	Phosphorylase b kinase regulatory subunit Phosphorylase b kinase regulatory subunit alpha, skeletal muscle isoform	OMIM
ANG	Angiogenin	OMIM
APOC3	Apolipoprotein C-III	OMIM
MVK	Mevalonate kinase	OMIM
APOC2	Apolipoprotein C-II	OMIM
TAX1BP3	Tax1-binding protein 3	OMIM
TNFRSF1A	Tumor necrosis factor receptor superfamily member 1A	OMIM
PDE4D	Phosphodiesterase cAMP-specific 3',5'-cyclic phosphodiesterase 4D	OMIM
NOS3	Nitric oxide synthase Nitric oxide synthase, endothelial	OMIM
ACTA2	Actin, aortic smooth muscle	OMIM
SIRT2	NAD-dependent protein deacetylase sirtuin-2	OMIM
FGB	Fibrinogen beta chain	GAD
F7	Coagulation factor VII	GAD
F5	Coagulation factor V	GAD
F2	Prothrombin	GAD
CYBA	Cytochrome b-245 light chain	GAD
CPB2	Carboxypeptidase B2	GAD
CBS	Cystathionine beta-synthase	GAD
APOA1	Apolipoprotein A-I	GAD
AGTR1	Type-1 angiotensin II receptor	GAD
ADH1B	Alcohol dehydrogenase 1B	GAD
ACE	Angiotensin-converting enzyme	GAD
TNF	Tumor necrosis factor	GAD
THBD	Thrombomodulin	GAD
TH	Tyrosine 3-monooxygenase	GAD
TAF1	Transcription initiation factor TFIID subunit 1	GAD
SERPINE1	Plasminogen activator inhibitor 1	GAD
PTGIS	Prostacyclin synthase	GAD
PROZ	Vitamin K-dependent protein Z	GAD
PON1	Serum paraoxonase/arylesterase 1	GAD
NR3C1	Glucocorticoid receptor	GAD
NOTCH3	Neurogenic locus notch homolog protein 3	GAD
LPL	Lipoprotein lipase	GAD
LDLR	Low-density lipoprotein receptor	GAD
IL1A	Interleukin-1 alpha	GAD
TP53	Cellular tumor antigen p53	GAD
PAFAH1B1	Platelet-activating factor acetylhydrolase IB subunit alpha	GAD
MPO	Myeloperoxidase	GAD
APOE	Apolipoprotein E	GAD
CCL11	Eotaxin	GAD
CCL5	C-C motif chemokine 5	GAD
COMT	Catechol O-methyltransferase	GAD
EDNRA	Endothelin-1 receptor	GAD
F13A1	Coagulation factor XIII A chain	GAD
IL6	Interleukin-6	GAD
ITGB2	Integrin beta-2	GAD
JAK2	Tyrosine-protein kinase JAK2	GAD
LCAT	Phosphatidylcholine-sterol acyltransferase	GAD
LIPG	Endothelial lipase	GAD
MTHFR	Methylenetetrahydrofolate reductase	GAD
RETN	Resistin	GAD
TBXA2R	Thromboxane A2 receptor	GAD
TNFSF4	Tumor necrosis factor ligand superfamily member 4	GAD
EDN1	Endothelin-1	GAD
PRKCH	Protein kinase C eta type	GAD
P2RY2	P2Y purinoceptor 2	GAD
NCF1	Neutrophil cytosol factor 1	GAD
MMP3	Stromelysin-1	GAD
LIMK1	LIM domain kinase 1	GAD
KCNN4	Intermediate conductance calcium-activated potassium channel protein 4	GAD
APOH	Beta-2-glycoprotein 1	GAD
IRAK1	Interleukin-1 receptor-associated kinase 1	GAD
APOB	Apolipoprotein B receptor	GAD
IL4	Interleukin-4 receptor subunit alpha	GAD
GP1BA	Platelet glycoprotein Ib alpha chain	GAD
GJA5	Gap junction alpha-5 protein	GAD
ABCA1	ATP-binding cassette sub-family A member 1	GAD
CYP4F2	Phylloquinone omega-hydroxylase CYP4F2	GAD
CYP4A11	Cytochrome P450 4A11	GAD
PTGS2	Prostaglandin G/H synthase 2	Drugbank
ACE	Angiotensin-converting enzyme	Drugbank
F2	Thrombin	Drugbank
NFKB1	Nuclear factor NF-kappa-B p105 subunit	Drugbank
ADORA2A	Adenosine receptor A2 Adenosine receptor A2a	Drugbank
PTGIS	Prostacyclin synthase	Drugbank
SELP	P-selectin	Drugbank
CA4	Carbonic anhydrase 4	Drugbank
[truncated: 5,000 more columns]
