# Supplementary material for: An Integrative Pharmacology-Based Analysis of Refined Qingkailing Injection Against Cerebral Ischemic Stroke: A Novel Combination of Baicalin, Geniposide, Cholic Acid, and Hyodeoxycholic Acid
Source: Front Pharmacol. 2020 May 8;11:519. doi: 10.3389/fphar.2020.00519 (PMC7227481; doi:10.3389/fphar.2020.00519)
Supplement: Supplementary file 3 [file Table_3.xlsx]

## Sheet: Sheet1
Supplementary Table S3 Detailed topological features of the candidate targets
GENE	DC	NC	CC	BC	LAC	EC
TP53	774	217.652	0.701995	11974.2	53.9692	0.137488
NTRK1	653	165.662	0.67587	8561.08	45.0782	0.122733
CUL3	451	143.754	0.647871	5097.85	49.2287	0.121987
ESR1	437	118.776	0.631874	5515.22	42.5212	0.103992
APP	423	52.5322	0.579815	3144.3	25.4615	0.0622689
EGFR	381	72.3525	0.588912	2982.49	31.9591	0.0651089
MCM2	379	117.422	0.62905	4110.94	44.4138	0.109407
FN1	376	101.016	0.620044	3979.69	40.1918	0.103415
UBC	373	100.566	0.613959	4400.47	38.9619	0.0886211
XPO1	348	67.2889	0.588912	2942.77	33.2865	0.0771957
CDK2	339	95.9759	0.613959	3757.26	39.8429	0.0982152
COPS5	330	105.797	0.611292	2694.47	48.1845	0.10609
HSP90AA1	330	95.5026	0.604077	3084.61	43.4103	0.0908488
CUL7	315	82.8082	0.604726	2515.13	36.9337	0.0923597
CUL1	314	106.838	0.609967	2582.16	49.0637	0.105458
MYC	301	53.7875	0.576254	1731.64	28.72	0.0607608
YWHAZ	286	86.7709	0.596398	2559.02	41.7596	0.0852252
VCP	277	77.1198	0.590766	2696.18	38.2874	0.0812251
NPM1	276	104.012	0.602139	2397.34	53.1927	0.104523
CAND1	275	91.3106	0.592632	1869.05	48.4972	0.0952509
RNF2	269	55.8546	0.580412	2226.49	28.2739	0.0682116
SIRT7	264	45.2678	0.572154	564.64	16.2469	0.0334573
HSP90AB1	264	75.2387	0.590147	1767.34	26.1748	0.0651014
ADRB2	264	20.3745	0.53619	2316.89	39.2254	0.0837418
GRB2	263	49.1401	0.564694	1537.35	29.0308	0.0551855
OBSL1	256	57.5528	0.582816	1518.33	31.2547	0.0771198
FBXO6	255	41.4574	0.568113	1287.07	25.3852	0.063378
HUWE1	254	72.261	0.592008	2328.54	36.0795	0.0837427
MDM2	252	55.1462	0.576254	2252.93	29.2867	0.0638277
EP300	249	58.3923	0.569262	1737.07	30.8921	0.0525518
CCDC8	241	53.521	0.578029	1717.45	29.9869	0.0714091
PARK2	239	45.3856	0.570415	1628.13	26.6143	0.0636163
BRCA1	236	56.2917	0.57332	2099.01	28.4276	0.0548987
HDAC1	235	48.5123	0.557426	985.756	29.3333	0.0425736
HSPA5	233	78.9263	0.592632	2819.36	39.3785	0.0835012
HNRNPU	228	90.3643	0.589529	1829.74	50.6959	0.0948008
EWSR1	228	49.0882	0.570415	1931.72	27.8429	0.0620797
HNRNPA1	226	73.5991	0.576254	1205.16	45.7285	0.0820625
AR	222	46.6358	0.559642	1280.56	27.7769	0.0437503
EEF1A1	220	68.0551	0.579815	1575.56	28.2754	0.0650705
VHL	220	45.3021	0.569262	1730.86	41.5897	0.0830509
NR3C1	218	29.2617	0.542912	833.108	20.3871	0.0328287
HSPA8	217	68.9551	0.582213	1632.04	39.6	0.0785862
SNW1	214	52.2664	0.570994	1774.3	29.461	0.0605934
HDAC5	213	50.9351	0.575077	1577.91	28.4324	0.0667489
YWHAQ	209	44.0271	0.560757	998.429	31.187	0.0606079
CUL2	209	58.0597	0.573904	1067.02	37.8276	0.0790152
CTNNB1	204	38.7081	0.560757	1304.87	29.4245	0.0689889
ARRB2	204	45.951	0.570415	1454.5	24.3689	0.0507618
RPA1	202	46.2406	0.563564	1077.48	23.0926	0.0414801
UBE2I	202	35.7061	0.552502	1088.36	31.3438	0.0634321
RELA	198	42.9749	0.554134	982.16	27.9558	0.0439178
EED	197	41.0577	0.565261	1198.91	25.5038	0.0603039
NFKB1	194	37.0793	0.55142	840.19	26.3113	0.0442109
PAN2	192	47.7184	0.568113	1161.38	31.4559	0.0707678
RPA2	189	35.8802	0.559086	768.58	27.1919	0.03358
CREBBP	189	40.2758	0.547133	985.112	25.2689	0.0582057
UBL4A	185	47.5266	0.560757	890.056	34.568	0.0682436
IKBKG	184	39.5164	0.559086	1169.1	26.5667	0.0523596
SRC	183	35.5895	0.549268	954.915	23.8039	0.0372904
AKT1	183	36.5968	0.554134	1068.34	25.1081	0.0433989
FUS	181	56.4742	0.568687	1077.91	37.4672	0.0718592
U2AF2	179	53.6299	0.568687	1390.98	32.7883	0.0659479
SMURF1	177	33.3045	0.560757	1254.39	22.1707	0.0568449
CUL5	175	53.3164	0.561876	730.662	40.9444	0.0735534
STAU1	173	42.8353	0.560757	725.246	24.6061	0.0390979
SMAD3	173	33.7909	0.547665	768.969	24.4476	0.0438887
CALM1	173	33.768	0.549805	768.969	24.4476	0.0438887
CALM3	173	33.768	0.549805	768.969	24.4476	0.0438887
CALM2	173	33.768	0.549805	782.92	32.1057	0.06672
CSNK2A1	172	39.7986	0.555775	896.577	28.2193	0.0523034
CSNK2A3	172	39.7986	0.555775	896.577	28.2193	0.0523034
YWHAG	169	37.0636	0.549805	718.033	28.0485	0.0492713
CUL4B	169	50.3404	0.562438	794.538	37.456	0.0709419
HSPA4	167	38.0666	0.55468	845.184	27.7387	0.0525067
CLTC	166	38.0848	0.555227	1011.19	26.1327	0.0535073
YWHAE	165	36.5931	0.549268	603.744	29.8039	0.0531085
RPS27A	163	42.501	0.558532	1254.93	30.675	0.0595416
ACTB	161	38.9944	0.558532	1246.53	26.6387	0.0547784
SMAD2	160	27.2496	0.543961	787.02	20.5435	0.0360659
TUBB	160	45.277	0.565829	1097.52	30.3511	0.0646096
MAPK1	158	31.5172	0.546072	876.89	22.0729	0.0347033
JUN	157	33.204	0.541867	499.979	25.7841	0.0329864
NCL	156	51.2457	0.563	702.042	25.9053	0.0463058
HSPB1	156	32.6233	0.545543	901.368	38.7165	0.0731186
TARDBP	154	51.8127	0.557978	623.989	25.6421	0.0449561
MYH9	154	33.2314	0.546072	665.242	40.6555	0.0691408
AURKA	153	30.274	0.546072	611.587	25.6186	0.0497935
ARRB1	151	26.074	0.543961	543.581	22.1429	0.0442407
FLNA	151	35.6324	0.548199	679.515	21.9432	0.0372078
ABL1	151	28.0388	0.541867	774.485	25.91	0.0453081
HDAC2	150	29.1679	0.536702	399.806	23.5375	0.0333502
RPS3	149	79.3848	0.569262	810.901	55.5036	0.0855057
XRCC6	145	27.3128	0.541867	486.114	23.125	0.0448453
PRKDC	145	32.0826	0.550342	730.165	25.125	0.0499306
PTEN	144	22.51	0.541346	557.962	19.7955	0.0433835
GAPDH	144	37.3687	0.549805	675.47	18.0723	0.0321735
GSK3B	144	22.7126	0.539272	774.031	28.75	0.0534118
PCNA	143	25.3927	0.534663	360.229	22.4026	0.038339
CDK1	143	25.7546	0.537727	417.377	22.075	0.0370084
RPS2	142	70.085	0.558532	264.668	60.5128	0.078645
RPL6	142	73.2855	0.556324	444.11	55.8583	0.0761736
HNRNPK	142	43.1509	0.555775	581.865	24.1798	0.0420395
PARP1	142	29.4835	0.541867	785.095	32.6842	0.061045
HDAC6	142	26.1866	0.546072	868.046	19.1458	0.0368925
RACK1	141	34.37	0.549805	326.036	59.3983	0.0791996
RPS8	141	71.9083	0.556874	547.608	13.6667	0.0290638
BAG3	141	16.0987	0.534156	587.594	21.2069	0.0406346
CDKN1A	141	25.3494	0.541346	863.621	28.5049	0.0554978
SP1	140	33.2522	0.542389	667.522	32.019	0.0576324
TUBG1	140	39.0617	0.550881	719.217	24.9355	0.0347521
COPS6	138	33.5088	0.542912	416.99	29.5667	0.0499614
RPS6KB2	137	23.9653	0.55142	256.621	17.1311	0.0293995
STAT3	137	23.8303	0.534663	493.809	19.8267	0.0273215
CRK	137	18.6557	0.527648	528.297	20.5542	0.0350965
ATF2	137	20.1438	0.537214	675.159	15.4074	0.0281457
BTRC	137	24.9397	0.537727	741.044	18.1226	0.0509593
BMI1	135	23.0617	0.538241	412.726	58.3684	0.0744401
HNRNPM	135	45.317	0.553045	458.323	21.5256	0.0284823
RPL5	135	70.2802	0.555227	521.591	18.5488	0.0324338
PML	135	30.2119	0.540826	521.591	18.5488	0.0324338
RB1	135	26.6148	0.535171	528.342	21.3523	0.0415694
H2AFX	135	25.6323	0.541346	584.218	36.9633	0.063893
COMMD3-BMI1	135	23.0617	0.538241	689.753	23.1609	0.0329957
MAP3K1	134	28.1737	0.545015	332.265	23.3151	0.0329218
HSPA9	134	33.372	0.55468	558.742	23.5341	0.0395856
YWHAB	134	26.2276	0.533649	583.614	23.7979	0.0470089
IQGAP1	134	30.2236	0.542389	810.333	24.955	0.0564641
HSPA1A	133	32.1838	0.550881	465.415	30.2553	0.0542244
HSPA1B	133	32.1838	0.550881	549.92	32.6286	0.0586751
CEP250	133	32.6673	0.542912	583.699	25.8173	0.0534757
NEDD8	133	39.1618	0.549805	583.699	25.8173	0.0534757
PABPC1	132	45.6918	0.550881	424.26	10.3231	0.0245344
PPP1CA	132	28.425	0.541346	527.908	38.3551	0.0641865
HLA-B	132	11.9254	0.528143	531.841	23.4023	0.0397912
DDX5	131	36.192	0.549805	283.871	15.7966	0.0189919
CBL	131	25.2218	0.535171	359.52	58.0085	0.0792284
RPLP0	131	70.0359	0.557426	488.092	20.3077	0.0303457
FYN	131	17.974	0.521779	574.455	29.3942	0.0559279
RXRA	130	16.4415	0.504933	101.809	15.9048	0.0136281
TRIM28	130	30.2873	0.545015	630.037	23.9579	0.0466024
RPS3A	129	71.9166	0.556874	371.877	59.0508	0.0784968
HSPD1	129	32.2655	0.543436	403.526	28.4022	0.0513798
HDAC3	129	27.9409	0.536702	410.114	23.275	0.0304917
STUB1	128	28.4144	0.538756	488.789	23.439	0.0337999
CUL4A	127	33.3972	0.542912	418.624	12.3276	0.0230116
ATP1A1	127	13.8337	0.525677	444.926	28.9341	0.0502704
RPS14	126	65.1233	0.555775	303.034	13.7193	0.0230429
ILK	126	18.2183	0.53264	344.197	16.4286	0.0311694
VIM	126	22.7666	0.539789	504.866	53.3947	0.0718314
PRKCA	126	15.1006	0.525677	709.747	18.3333	0.0383732
SOD1	125	11.9096	0.49823	198.249	11.0465	0.0130384
PSMA3	125	27.6953	0.539789	469.182	17.026	0.0312364
EZH2	125	19.8168	0.53619	509.235	22.2941	0.0375901
RPS4X	124	72.4591	0.555775	252.637	60.5652	0.0778138
RPL13	124	55.3558	0.548733	375.252	57.9224	0.0760911
RPL7	124	69.7739	0.556324	422.11	49.5392	0.0663398
CDC37	124	24.8256	0.538756	665.14	20.0976	0.0360781
CSNK2B	123	18.3022	0.530631	308.944	17	0.0301877
RPS16	122	68.0575	0.553589	257.003	59.9273	0.0736934
RPS6	122	70.0444	0.553045	272.975	18.5606	0.0316021
PPARG	122	21.1899	0.527648	317.522	18.7619	0.0218624
TNFRSF1A	122	21.6208	0.528638	343.64	57.8	0.0718418
FBXW11	122	19.9413	0.529135	402.678	18.1944	0.0277363
PXN	121	21.9922	0.53619	199.105	12.766	0.0171503
PIN1	121	16.8747	0.53568	487.55	19.2911	0.0372046
BCL2	121	13.7027	0.518416	629.953	14.32	0.0284653
RPL23	120	59.3073	0.550881	252.437	21.7313	0.0298474
PPP2CA	120	22.0656	0.539272	480.473	50.4811	0.0655954
POLR2A	120	22.3867	0.533144	498.19	19.5541	0.0345308
SMARCA4	120	24.5569	0.530132	621.038	18.0602	0.0355935
TRAF2	119	23.5519	0.533649	399.719	20.0822	0.0300738
RPL11	118	64.2018	0.549805	230.32	57.2308	0.0696508
RPL4	118	66.9772	0.554134	333.552	56.3153	0.0719352
RUVBL2	118	28.5705	0.541867	345.847	17.069	0.0221112
SQSTM1	118	23.3285	0.537214	467.583	24.6591	0.0453673
PIK3R1	118	19.7174	0.525677	661.69	19.0125	0.0335921
CFTR	117	12.8639	0.520814	263.323	11.8333	0.020486
CD81	117	21.8603	0.531132	354.933	20.4125	0.0424985
EEF2	116	36.9784	0.541867	369.712	34.3596	0.0560163
PSMD2	116	19.1151	0.529633	395.182	16.3529	0.0289035
HNRNPR	116	33.5109	0.541346	402.139	28.8851	0.048885
PPP2R1A	116	21.9651	0.535171	425.122	19.2838	0.0377343
LMNA	115	23.0797	0.534663	301.742	22.1408	0.0394225
HNRNPD	115	31.8952	0.541867	339.144	21.0811	0.0360518
SFN	115	23.608	0.531132	459.267	27.9663	0.0489192
RPL18	113	66.7617	0.549805	229.68	58.5524	0.0710664
OTUB1	113	16.3556	0.529633	329.473	17.9118	0.0314508
KPNB1	113	22.4164	0.537727	387.536	14.4769	0.0295218
USP7	113	20.1336	0.531132	501.786	19.6329	0.0331198
NFKBIA	113	23.1465	0.536702	533.005	18.7125	0.0400265
SIRT1	112	20.9686	0.530631	201.27	57.6869	0.0667199
RPL23A	112	63.7987	0.545015	288.151	19.9846	0.0278998
ABCE1	112	13.5449	0.522748	321.118	10.8431	0.0191732
IKBKB	112	26.0965	0.534663	323.765	12.4615	0.0231786
KAT5	112	21.763	0.528143	365.48	22.6447	0.0321232
BAG6	112	11.7798	0.521296	377.403	18.5072	0.0289189
TUBA1A	112	23.2158	0.539272	577.124	19.5366	0.0384201
TUBA1C	111	27.2965	0.537727	216.182	16.4035	0.029385
RPS19	111	61.712	0.546072	280.03	55.3939	0.0644189
CANX	111	17.7129	0.523721	286.773	10.8269	0.0203541
RAF1	111	22.0447	0.532136	289.818	24.5875	0.0442033
PRKACA	111	11.6448	0.523234	384	19	0.0283453
DDB1	110	20.6007	0.531634	135.537	58.1789	0.0652941
DCUN1D1	110	30.3516	0.533649	240.148	28.3165	0.0465756
C1QBP	110	21.8631	0.531634	293.485	28.5595	0.0490958
RPL14	110	62.8179	0.543436	386.272	18.169	0.0355619
YBX1	110	31.324	0.539272	392.891	20.0556	0.0376481
CAV1	109	17.1795	0.527648	455.18	14.4762	0.0224224
RPL3	108	60.9542	0.546072	237.397	56.3469	0.0679458
MAPK8	108	20.3571	0.531132	500.887	17.2639	0.0247828
SRPK2	107	16.0408	0.525187	224.131	15.3091	0.0249969
ATP5A1	107	28.3852	0.533649	236.531	26.3733	0.0448381
NOTCH1	107	14.1195	0.524697	370.041	13.0175	0.0200202
SFPQ	106	24.3736	0.536702	287.248	15.3175	0.0286769
SUMO2	106	16.6769	0.52666	411.702	21.3125	0.0395967
RUVBL1	106	25.7791	0.539272	460.742	22.2381	0.0409774
CASP3	105	13.1628	0.525187	308.023	16.1333	0.0222605
MAPK3	105	18.031	0.52666	332.326	11.807	0.0196705
CSNK2A2	104	14.1431	0.523721	221.487	15.3529	0.0181048
MAPK14	104	17.3918	0.527154	249.669	17.1525	0.0220907
KAT2B	104	18.7575	0.525187	252.056	13.3273	0.0228478
RARA	104	16.3364	0.519852	272.72	16.2295	0.024902
RPS5	103	57.2493	0.541346	171.817	17.6792	0.0216801
NCOR1	103	22.434	0.523721	191.603	55.7447	0.0643173
NEDD4	103	14.753	0.527648	221.106	52.8526	0.0625082
SNCA	103	19.6836	0.528143	230.181	19.8333	0.0212165
RPL7A	103	59.5636	0.544487	333.108	17.597	0.0259189
SMAD4	103	18.7792	0.523721	396.083	13.2063	0.0240249
FAF2	102	14.04	0.520333	104.146	57.4674	0.0652146
RPS10	102	56.7208	0.543436	126.696	30.4179	0.0453895
MCC	102	8.05442	0.513218	185.943	13.32	0.0226397
RPL8	102	60.8683	0.543436	188.212	7.72093	0.017321
CHUK	102	27.6242	0.535171	196.663	53.3478	0.0616107
NOS2	102	21.3257	0.535171	269.534	21.3485	0.03667
HSP90B1	102	23.4791	0.530132	316.584	22.8553	0.0396702
NFKB2	102	24.6945	0.533144	415.417	18.3333	0.0377995
FBL	102	31.3617	0.531634	435.324	23.4557	0.033827
DBN1	101	20.3611	0.526168	204.177	54.6596	0.064651
RPS9	101	58.4087	0.544487	211.419	54.5895	0.0642871
RPL12	101	58.6379	0.545543	241.287	16.8814	0.0236553
ENO1	101	22.5959	0.531132	243.708	18.8966	0.0245517
CDKN2A	101	19.0522	0.531634	272.276	21.2576	0.0291288
HIF1A	101	23.1608	0.530132	308.275	19.8696	0.0329552
PRKCD	101	18.1881	0.527154	326.976	19.5441	0.0353045
PPP1CC	101	21.9014	0.53264	344.851	17.5147	0.0329521
RPS25	100	60.721	0.545543	112.664	59.3368	0.0663418
RPS7	100	58.1181	0.541867	137.845	56.7174	0.0633903
RPL19	100	60.2946	0.540826	154.046	54.6196	0.0624937
RPL15	100	63.4392	0.542389	165.28	14.6327	0.0186779
MED4	100	4.32782	0.496035	178.751	55.7684	0.0640417
HNRNPA2B1	100	30.3451	0.540826	191.47	4.12903	0.00881766
HNRNPH1	100	32.356	0.541346	233.493	16.4737	0.0226417
SUMO1	100	17.7511	0.524209	280.238	27.814	0.0508016
CCT3	100	27.0833	0.537727	376.503	28.4773	0.0502444
ERBB2	100	15.2929	0.518894	383.135	23.321	0.0401956
PCBP1	99	20.8871	0.531634	142.344	57.2473	0.0636945
RPS13	99	61.721	0.542389	166.993	54.3152	0.0623737
IQCB1	99	10.7154	0.519373	187.621	16.3137	0.0208066
RPLP2	99	57.4176	0.542912	268.337	12.4844	0.0286398
KDM1A	99	17.2157	0.520333	276.215	9.89286	0.0225258
FBXO25	99	13.3632	0.529135	289.681	26.375	0.0457799
SIN3A	99	19.9474	0.526168	333.939	18.9118	0.0366632
DDX17	99	28.9101	0.537727	351.445	17.4262	0.0221508
STAT1	98	17.0739	0.529135	92.8766	58.5275	0.065981
RPL10A	98	60.9825	0.541867	189.875	28.5658	0.0448998
CFL1	98	21.6882	0.533649	350.679	18.6324	0.0364268
CCT2	98	30.7703	0.53568	453.915	14.8182	0.0242358
ATP5B	98	20.2886	0.530631	482.963	18	0.0308741
RPN1	97	19.1435	0.527648	145.027	55.4725	0.0610765
RPL31	97	58.9808	0.541867	229.887	54.8352	0.0603913
RPL24	97	58.691	0.541346	256.83	27.6711	0.0472132
ACTG1	97	20.2634	0.533649	264.959	17.45	0.0294646
TUFM	97	29.2885	0.532136	273.812	13.1852	0.0206511
HTT	97	15.1742	0.527154	330.505	13.8475	0.0224036
BARD1	97	14.2954	0.520814	422.673	17.625	0.0295289
FOS	96	14.9014	0.523234	110.831	54.6667	0.0601599
RPS18	96	56.9988	0.539789	193.377	16.7708	0.0243949
CDK9	96	17.2155	0.530631	247.046	13.7679	0.0203548
YWHAH	96	17.5791	0.521296	286.702	16.0597	0.03055
PHB	96	20.9917	0.531132	363.528	18.7164	0.0347137
CASP8	95	13.7845	0.519852	110.459	57.8539	0.06166
RPL21	95	61.0486	0.541346	202.048	12.8913	0.0172298
PAXIP1	95	10.2793	0.522748	210.292	13.08	0.0211465
UBE2D1	95	13.7763	0.519852	282.228	9.5	0.0195772
RPS24	94	59.4443	0.538241	104.301	56.7442	0.059284
WWOX	94	13.8589	0.528638	211.863	15.6842	0.0242463
MDC1	94	17.5691	0.527154	244.545	17.3333	0.0282304
SLC25A5	94	32.4999	0.540826	244.545	17.3333	0.0282304
PPP1CB	94	16.7529	0.525187	282.07	12.8281	0.027537
SMN1	94	18.323	0.525677	290.208	15.9833	0.0253842
SMN2	94	18.323	0.525677	360.676	30.3605	0.0533886
TKT	93	19.1604	0.521779	229.685	17.1132	0.022499
DDX3X	93	25.039	0.539789	358.438	22.6235	0.0488068
RPLP1	92	48.2405	0.530631	197.963	46.9367	0.0517988
STIP1	92	19.7718	0.525187	261.269	18.4576	0.0256505
DNAJA1	92	22.8857	0.534156	270.236	17.3729	0.0257504
PSMC5	92	21.2721	0.527648	279.176	19.2787	0.0294706
PSMD4	92	20.5685	0.52666	290.631	11.28	0.0204863
TUBA4A	92	20.4578	0.53264	315.24	19.1831	0.0378059
DYNLL1	92	12.487	0.519373	316.268	20.7432	0.0387315
EEF1D	91	18.3657	0.530132	235.298	14.7692	0.024263
ISG15	91	12.7999	0.531132	287.53	16.918	0.0295293
PLK1	91	16.0175	0.522748	338.623	17.1212	0.0328438
RBBP4	91	18.4484	0.527648	346.096	11.4	0.0300754
CAD	91	26.0297	0.536702	407.219	22.6625	0.0376517
TUBB4B	90	21.5042	0.53568	221.447	19.5333	0.0273954
CRY2	90	16.0541	0.530631	279.022	20.1467	0.0437307
LIMA1	90	21.2051	0.527154	288.213	14.5571	0.0325353
P4HB	89	21.2857	0.525187	161.345	13.5581	0.0184853
LYN	89	14.1542	0.516514	188.396	20.0345	0.0317129
AHSA1	89	21.3377	0.532136	233.083	19.4776	0.0375528
RAD21	89	20.4538	0.529135	261.067	20.0857	0.0392199
DAXX	88	15.0455	0.517939	148.06	52.3373	0.0554253
RPL30	88	54.7823	0.537214	179.975	14.3125	0.0193357
UBE2D3	88	12.3239	0.520814	190.511	11.74	0.0206214
RPS27	87	48.0027	0.534156	100.489	6.07692	0.0107357
TBK1	87	21.8003	0.531132	164.327	19.8727	0.0292914
EMD	87	17.5965	0.529633	216.908	46.525	0.0521522
HSPA1L	87	20.3218	0.534156	263.856	17.5323	0.0321965
LDHA	87	21.5243	0.522748	274.42	18.4167	0.0364153
KPNA2	87	19.1785	0.528143	344.955	15.9344	0.0259964
ALB	87	6.60444	0.494293	347.01	20.0882	0.033907
KHDRBS1	87	17.7097	0.525677	376.226	14	0.0293051
UBB	87	16.0825	0.532136	422.487	16.1719	0.0306576
SRSF1	86	26.9961	0.530631	66.0253	56.1299	0.0536042
RPL27	86	57.7472	0.531132	82.3773	55.025	0.05617
RPL18A	86	56.53	0.535171	152.127	16.1569	0.0247728
HNRNPF	86	26.6417	0.531132	159.011	16.7255	0.0216503
AP2M1	86	16.7461	0.522263	162.039	25.5143	0.0438511
NONO	86	21.0791	0.531132	223.255	24.7273	0.0384659
TP73	86	17.3378	0.521779	228.614	19.8529	0.0362796
NAP1L1	85	24.7803	0.531132	169.971	12.8545	0.0241004
TNFRSF1B	85	13.8264	0.519852	343.582	23.338	0.0417568
RPL37A	84	52.5529	0.533144	121.899	14.4348	0.0201104
NCOR2	84	18.4671	0.51604	133.964	23.9153	0.0342225
AURKB	84	18.4939	0.524697	135.166	17.8148	0.0302813
LDHB	84	17.0719	0.517939	153.18	17.617	0.016898
UQCRC2	84	15.1235	0.515568	172.856	16.0816	0.0237679
TOP1	84	24.9605	0.525677	180.881	50.8553	0.0506535
NCOA3	83	20.5271	0.525187	153.557	23.3281	0.0343083
CCT6A	83	24.3627	0.530132	159.117	14.75	0.0197038
VDAC1	83	10.8055	0.515568	176.873	10.2143	0.015884
UCHL5	83	15.4701	0.521296	289.383	18.3729	0.0214264
ATM	83	15.4172	0.517463	308.491	13.7679	0.0209106
ITCH	83	14.9754	0.523721	312.401	14.0755	0.019506
EEF1G	82	18.2468	0.523234	88.5473	50.3151	0.0492268
TCP1	82	25.1114	0.529135	88.5473	50.3151	0.0492268
RPS26	82	51.7221	0.531132	121.579	17.7222	0.0337968
CDC42	82	9.09216	0.514625	141.791	24.1719	0.0374381
LOC101929876	82	51.7221	0.531132	214.766	8.66667	0.0143462
EZR	82	13.6247	0.519373	223.067	12.7143	0.0196694
HECW2	81	7.07407	0.49823	69.8423	6.82143	0.0108044
SKI	81	15.7718	0.528143	94.0324	17.2326	0.0167469
DYNC1H1	81	15.9029	0.52666	117.792	6.85714	0.0141251
SPTAN1	81	19.2832	0.527648	171.906	25.0606	0.039321
MATR3	81	28.1891	0.53264	186.214	15.875	0.0174256
ICAM1	81	25.7961	0.518416	203.134	26.4085	0.0397535
PTK2	81	17.1595	0.520814	239.845	18.0833	0.0308964
ANXA2	81	17.8448	0.529135	244.868	15.0952	0.0313211
IFI16	81	7.05882	0.511353	267.64	16.6094	0.0339866
ACTN1	81	12.5663	0.520814	272.711	11.78	0.0203539
NCOA1	81	17.8397	0.515568	294.914	14.5574	0.0310454
SKP1	80	17.304	0.522748	136.257	16.7736	0.029561
MAPRE1	80	16.2832	0.522748	188.714	22.2836	0.0367688
PHB2	80	13.2332	0.522263	192.779	11.3077	0.0223273
GRK5	80	11.7699	0.521296	206.216	10.025	0.0167241
CCT4	80	23.5731	0.531132	210.773	12.3673	0.022697
CHD3	80	16.398	0.517463	235.277	14.9623	0.0215205
RAB7A	80	10.5901	0.512284	236.422	15.098	0.0190303
SRPK1	79	17.8234	0.523721	74.0514	14.775	0.0179576
CCT8	79	24.4637	0.530132	144.277	23.5538	0.0366776
PSMA1	79	15.0301	0.518416	178.538	14.7347	0.0216715
REL	79	15.1538	0.514155	208.968	14.2979	0.0183406
UBE3A	79	15.479	0.521296	212.442	17.0577	0.0257437
E2F1	78	15.5165	0.517463	48.1969	50.8551	0.0477069
TBP	78	16.5667	0.509502	103.916	15.9512	0.0161777
RPS15	78	52.1327	0.525187	121.842	15.0222	0.0188398
RANBP2	78	18.9886	0.525677	145.885	12.9787	0.0191466
TP63	78	14.6197	0.518894	153.053	14.1875	0.0228075
TRAF1	78	13.4373	0.517939	218.197	18.7869	0.0341202
ELAVL1	78	19.7147	0.52666	253.096	17.871	0.0308008
PRDX1	77	18.5225	0.526168	98.0265	10	0.0144152
MAPT	77	17.7539	0.523234	127.425	15.3125	0.0260912
IMMT	77	11.8425	0.519373	157.792	17.569	0.0328839
VAPA	77	10.3175	0.507665	172.111	16.8545	0.0232841
ACTA1	77	15.4565	0.522748	174.81	21.0508	0.0311653
CCT7	77	21.8305	0.527154	190.368	10.0889	0.0172478
RAD23A	77	15.964	0.519852	199.476	14.566	0.0225515
RAC1	77	10.6115	0.517463	206.109	15.1042	0.0197372
SLC25A3	77	15.8186	0.517463	283.174	10.86	0.0193265
WDR5	76	12.469	0.517939	50.7375	9.76923	0.00866031
NCK1	76	10.16	0.491703	113.668	10.1143	0.0138296
HDAC4	76	15.6009	0.519852	176.596	11.9333	0.0222916
IRAK1	76	16.4826	0.523721	208.265	14.6667	0.0194928
OFD1	76	10.5871	0.509502	234.549	15.76	0.020939
EPS15	76	16.7138	0.519852	241.785	15.6207	0.0236203
MSN	75	12.2369	0.515096	114.891	15.5111	0.0186164
APC	75	10.7348	0.518416	127.714	11.7632	0.0159723
HGS	75	11.5262	0.513218	195.392	10.9024	0.0158837
SMARCB1	75	16.1735	0.514625	216.484	10.1702	0.0181079
SRSF2	74	16.8418	0.522748	108.989	8.45	0.0178436
SET	74	15.7023	0.522263	156.222	10.8864	0.0172528
TAB2	74	21.0723	0.52666	163.787	16.7925	0.0221223
CDH1	74	11.2746	0.516988	185.923	10.8043	0.0167541
LGR4	74	8.7016	0.508582	190.749	19.7627	0.028638
TXN	74	14.0677	0.522263	190.903	13.25	0.0250091
CALR	74	16.6422	0.519373	192.997	14.9	0.0248603
SMARCC1	74	18.0364	0.521296	198.807	15.75	0.023054
NFATC1	74	11.3654	0.516988	258.499	15.7778	0.027124
ECT2	73	6.6323	0.51604	23.6309	4.35294	0.00563204
SMAD1	73	13.8422	0.515096	110.915	10.5	0.0133425
TRIM27	73	10.915	0.509042	113.275	14	0.0174426
NR4A1	73	14.432	0.515568	128.155	13.4634	0.0152112
TCTN3	73	4.625	0.454399	186.424	6.35	0.0143271
LUC7L2	72	15.8996	0.519852	28.4107	8.05	0.00682464
UBQLN1	72	11.6393	0.513686	76.2995	12.2647	0.013426
KRT18	72	13.7529	0.522748	96.2183	4.625	0.0119758
SF1	72	13.878	0.518894	117.053	11.2432	0.0148645
PLCG1	72	12.7839	0.510889	124.938	11.2045	0.0214664
RAN	72	11.5405	0.515096	149.393	15.4375	0.0240862
BCL2L1	72	8.47368	0.48914	150.599	13.5111	0.0205825
PRKAB1	72	4.77419	0.506295	251.314	13	0.0232899
PAK2	71	12.6481	0.516988	47.3825	3.29412	0.00352991
CTBP1	71	13.0548	0.511818	103.667	16.2667	0.0277049
PTPN1	71	11.4898	0.514155	112.88	7.16667	0.0126283
PSMC3	71	14.6929	0.519852	120.778	12.6579	0.0145478
TMEM17	71	3.5	0.43341	129.943	15.2619	0.0152189
PRMT1	71	16.7054	0.518894	146.873	16	0.0166427
GOLGA2	71	7.44007	0.508123	147.098	13.1702	0.0197788
PIAS1	71	16.7049	0.513686	172.087	12.3529	0.0216484
RELB	71	12.9462	0.51604	183.567	12	0.0172372
ZBTB16	71	15.8053	0.511818	187.597	14.1458	0.0200347
TP53BP1	71	13.6972	0.520333	209.368	10.925	0.0139755
POT1	70	8.60026	0.509502	110.749	19.6481	0.0320397
SPTBN1	70	15.5329	0.524209	114.01	8.34884	0.0181992
YY1	70	17.3731	0.518894	117.86	16.875	0.0211794
PRPF8	70	20.1592	0.522748	126.657	16.98	0.0259982
IRS4	70	14.9329	0.522263	132.16	16.0769	0.0257814
SF3A1	70	17.4853	0.518894	168.902	14.8654	0.026599
TOP2A	70	16.6058	0.521779	201.359	14.32	0.0258036
PRMT5	69	12.7239	0.519373	86.4364	9.03125	0.0126613
RBX1	69	15.5474	0.517463	87.8673	6.3	0.0113822
DCTN1	69	9.42903	0.509502	100.291	12.0263	0.0167798
HSPE1	69	11.6802	0.506751	106.433	11.3514	0.0158924
CCT5	69	21.421	0.527648	114.017	15.1111	0.0235949
LGALS3	69	6.51724	0.506295	123.818	17.8163	0.024327
ACTN4	69	12.3303	0.520333	140.258	20.7627	0.032532
SMARCA5	69	18.6303	0.519373	180.065	12.25	0.0237936
TSG101	69	12.368	0.516514	193.082	11.8043	0.0211189
SSX2IP	68	8.50205	0.501336	74.6072	14.2857	0.0118204
PIAS4	68	10.7766	0.508123	77.0114	10.0294	0.0145367
BAG2	68	17.7396	0.520333	79.8774	11.8571	0.0145503
RHOA	68	10.3333	0.509502	79.8774	11.8571	0.0145503
MYO1C	68	16.4431	0.518416	85.2725	25.5455	0.0356726
NME1-NME2	68	12.2188	0.507207	91.3497	10.6098	0.0223851
CREB1	68	14.7087	0.501336	93.6775	10.8857	0.0152105
CEP76	68	10.875	0.499113	94.0752	17.1458	0.0261658
PSMD1	68	17.0191	0.523234	104.804	16	0.0207441
HNRNPL	68	26.2363	0.524209	108.747	17.4898	0.0237437
VDAC2	68	11.2524	0.508582	126.907	8.16129	0.0104601
CLU	68	10.8482	0.517463	146.42	12.119	0.0215277
CCND1	68	17.9942	0.518894	147.032	10.4359	0.0130783
SERBP1	68	22.3939	0.525187	179.133	13.5957	0.017774
PRKCZ	68	14.1794	0.516514	179.663	21.8136	0.0359755
RANBP9	68	11.295	0.517939	182.441	16.1569	0.0248521
TPM3	68	12.4886	0.517939	194.652	10.225	0.0172947
NME2	68	12.2188	0.507207	213.542	10.8409	0.0181037
CTTN	67	13.4081	0.518416	81.5935	15.5854	0.0147145
RAB1A	67	6.44153	0.49386	113.598	15.125	0.0245234
UBE2L3	67	11.4499	0.518894	130.004	13	0.0203301
GTF2I	67	15.5846	0.519373	134.458	6.09375	0.011144
SMARCA2	67	16.2257	0.508123	211.504	10.913	0.0184297
MAP3K7	66	13.9593	0.516514	75.2448	7.10714	0.0125503
MSH2	66	12.3483	0.515568	75.4282	41.0615	0.0456113
RPS17	66	41.8805	0.524697	81.6924	6.62963	0.011238
HERC2	66	9.32708	0.509042	116.23	9.0303	0.0130168
TSC22D1	66	6.89231	0.5	144.834	11.9302	0.0202118
MMS19	66	7.37322	0.505386	166.484	13.4318	0.0171128
MTOR	66	13.3411	0.518894	179.22	12.7447	0.0208352
TUBA1B	65	11.1173	0.526168	80.9158	18.766	0.0289609
THRAP3	65	14.8897	0.520814	83.3606	16.3415	0.0167236
PCBP2	65	19.2376	0.516988	101.062	11.3556	0.0231665
NCOA6	65	16.8118	0.514625	124.383	16.7708	0.0277623
USP9X	65	11.7199	0.522748	136.708	8.85714	0.0129672
HNRNPUL1	65	17.2658	0.518416	157.161	12.7442	0.0211736
PDIA3	65	13.4368	0.518894	179.91	14.2157	0.0249812
PDCD6IP	65	9.15362	0.509964	268.708	10.9615	0.0224801
ESRRB	65	11.6621	0.510889	292.167	10.5614	0.0263004
RPL26	64	38.8557	0.517939	42.005	38.0702	0.0389235
JAK2	64	14.0148	0.506295	76.355	14.4286	0.0119414
CDK5	64	12.5545	0.516514	76.9874	9.93939	0.0140508
AMFR	64	10.2625	0.50448	88.3877	12.5676	0.0163511
TAGLN2	64	12.9559	0.509502	109.675	17.7174	0.0230109
VDR	64	14.8775	0.499113	111.266	13.4	0.0150762
UBXN1	64	12.3064	0.512284	141.104	12.122	0.0162347
TAB1	64	18.2484	0.518416	157.407	11.85	0.0176546
SYK	63	15.3449	0.51275	56.3866	19.1795	0.0146152
BTK	63	11.5278	0.512284	80.3922	17.0488	0.0221171
RBM39	63	19.1933	0.523234	81.8163	11.1892	0.0159921
AHCYL1	63	6.63559	0.5	98.6539	5.03846	0.00751203
IRS1	63	14.9525	0.516514	102.541	11.7179	0.0142488
CEBPB	63	19.7899	0.509502	128.017	16.4286	0.0240579
LCK	63	12.0542	0.51275	131.522	13.7442	0.0197257
PSMA7	63	16.4179	0.520814	135.23	14.2273	0.0171567
ALDOA	63	17.5345	0.51604	141.799	12.4783	0.0211514
CEP128	63	5.28	0.492995	142.079	18.3962	0.0308435
UBR5	63	12.8578	0.518416	190.629	14.3469	0.0165193
NFKBIB	63	16.9542	0.519852	212.23	6.37143	0.00999568
TGM2	63	14.2417	0.517939	212.867	15.34	0.0219527
MTNR1A	62	10.1525	0.506295	48.7144	8.09091	0.00846776
LRIF1	62	6.65897	0.491703	76.6816	16.5641	0.016748
CSE1L	62	14.516	0.520333	78.0925	7.80645	0.0151673
PSMD11	62	13.725	0.519373	86.8858	11.0556	0.0145439
CHEK2	62	11.3714	0.508582	93.4727	9.79412	0.0152632
RIPK1	62	17.0592	0.510889	115.982	23.8214	0.0369815
SMARCE1	62	10.5289	0.510426	121.697	6.41935	0.00941291
NOS3	62	8.47619	0.49386	127.334	10.2	0.0130969
MYBBP1A	62	24.5393	0.523721	139.127	13.8936	0.0246214
HAX1	62	8.07692	0.511353	173.516	13.1304	0.0210742
TLN1	61	14.0929	0.512284	60.3541	14.3611	0.018992
RBM14	61	16.3981	0.516514	83.2792	13.6842	0.0208161
RBM14-RBM4	61	16.3981	0.516514	85.7616	16.5682	0.0271082
SSB	61	17.0724	0.519373	94.4085	15.9565	0.0270792
PTGES3	61	13.1271	0.511818	94.4085	15.9565	0.0270792
CD4	61	11.1996	0.510889	96.5857	5.46875	0.0137664
ANXA7	61	5.6628	0.509502	97.2691	10.0303	0.0145237
UBE2N	61	10.3468	0.510426	98.6689	12.7692	0.0192406
PPIA	61	16.5365	0.516988	109.757	15.9778	0.0259902
TPI1	61	14.8417	0.510426	133.116	10.7674	0.02117
CSNK1A1	60	11.3818	0.516988	32.3295	5.59091	0.0111001
TNIK	60	6.2525	0.496473	54.3893	20.9792	0.0323599
KPNA1	60	12.9776	0.514155	100.335	16.4651	0.0218924
GNAI2	60	5.85714	0.499113	106.697	14.6364	0.0267024
DNAJC7	60	17	0.518894	123.81	12.5909	0.0218841
PSME3	60	13.3041	0.513686	127.272	12.9211	0.0157204
ALYREF	60	21.4255	0.520333	133.952	10.9756	0.0197573
G3BP1	60	15.1179	0.519373	154.164	5.96875	0.0103004
EEF1A2	59	13.6933	0.522263	26.0424	47.0862	0.0417255
DVL2	59	10.0164	0.511818	46.2011	7.09524	0.00789556
PRDX2	59	12.4859	0.507207	67.2944	13.2812	0.0108006
PAFAH1B1	59	7.45	0.488715	75.2063	12.0323	0.016109
KIAA0368	59	8.62951	0.50584	76.8579	12.4167	0.016106
SVIL	59	12.6398	0.509964	78.9637	8.33333	0.0159497
PDLIM7	59	10.3828	0.513218	83.298	13.1429	0.0180807
INSR	59	13.9156	0.496911	103.075	12.7368	0.0194776
DNAJB1	59	13.1947	0.515096	111.176	9.61765	0.0143542
RBBP7	59	12.7815	0.50448	124.057	10.0769	0.0161087
RPL10L	59	48.0652	0.516988	158.363	13.283	0.0282575
MAPK6	59	6.73289	0.505386	159.384	12.2439	0.0155125
TRADD	59	13.5217	0.509502	176.932	6.33333	0.0115993
DSP	58	11.931	0.510889	8.73613	4.1	0.0042554
SEC16A	58	11.7196	0.515568	44.3799	9.55556	0.0133239
PAK1	58	11.3253	0.515568	78.0028	8.43333	0.0108651
KMT2A	58	13.6264	0.501336	80.1721	12.6176	0.0172865
COPS2	58	13.0061	0.50448	83.8435	13.2	0.0125571
APOA1	58	4.55556	0.454032	94.2344	9.39394	0.0148509
USP11	58	9.92308	0.501783	96.9099	14.1818	0.0223063
PSEN1	58	7.70788	0.486603	101.246	7.32143	0.00771332
SLC25A6	58	9.04583	0.513686	107.141	5.73077	0.00780753
HRAS	58	8.72414	0.502679	108.114	11.5	0.0226672
HMGB1	58	9.70324	0.511818	112.872	8.8	0.0212682
CHEK1	58	14.5866	0.519373	131.164	11.3095	0.0206374
A2M	58	6.00571	0.492133	137.809	10.9	0.0150657
